# Supplementary material for: Exchange coupling and magnetic blocking in dilanthanide complexes bridged by the multi-electron redox-active ligand 2,3,5,6-tetra(2-pyridyl)pyrazine
Source: Royal Society of Chemistry journal article supplement (doi:10.1039/c4sc02154a), 2014-08-26
Supplement: c4sc02154a1.pdf [file c4sc02154a1.pdf]

Supporting Information for

**Exchange Coupling and Magnetic Blocking in  
Dilanthanide Complexes Bridged by the Multi-Electron  
Redox-Active Ligand 2,3,5,6-Tetra(2-pyridyl)pyrazine**

Selvan Demir,<sup>a</sup> Michael Nippe,<sup>a</sup> Miguel I. Gonzalez<sup>a</sup> and Jeffrey R. Long\*<sup>a</sup>

<sup>a</sup>*Department of Chemistry, University of California, Berkeley, California 94720, USA. Email: jrlong@berkeley.edu*

*Chem. Sci.*

## Table of Contents

|                                                                                                                                                                                                                                        |     |
|----------------------------------------------------------------------------------------------------------------------------------------------------------------------------------------------------------------------------------------|-----|
| <b>Table S1.</b> Redox potentials observed in THF (0.1 M NBu <sub>4</sub> PF <sub>6</sub> ) for complexes <b>1-3</b> .                                                                                                                 | S3  |
| <b>Table S2.</b> Crystallographic data.                                                                                                                                                                                                | S4  |
| <b>Figure S1.</b> Structure of [(Cp* <sub>2</sub> Gd) <sub>2</sub> (μ-tppz')](BPh <sub>4</sub> ), <b>1</b> .                                                                                                                           | S5  |
| <b>Figure S2.</b> Structure of [(Cp* <sub>2</sub> Tb) <sub>2</sub> (μ-tppz')](BPh <sub>4</sub> ), <b>2</b> .                                                                                                                           | S6  |
| <b>Figure S3.</b> Connectivity of monoanionic fragment in the crystal structure of [(Cp* <sub>2</sub> Gd) <sub>2</sub> (μ-tppz')][K(crypt-222)], <b>4</b> , and [(Cp* <sub>2</sub> Tb) <sub>2</sub> (μ-tppz')][K(crypt-222)], <b>5</b> | S7  |
| <b>Figure S4.</b> Variable temperature dc susceptibility data for <b>2</b> between 2 and 300 K.                                                                                                                                        | S8  |
| <b>Figure S5.</b> Variable temperature dc susceptibility data for <b>1</b> (bottom), <b>2</b> (middle), and <b>3</b> (top), zoomed in to emphasize the minima in $\chi_M T$ at high- $T$ for each complex.                             | S9  |
| <b>Figure S6.</b> Variable temperature dc susceptibility data of polycrystalline <b>1</b> collected under 0.05 kOe, 0.1 kOe, 0.5 kOe and 1kOe applied dc field.                                                                        | S10 |
| <b>Figure S7.</b> Variable temperature dc susceptibility data for <b>4-6</b> between 50 and 300 K.                                                                                                                                     | S11 |
| <b>Figure S8.</b> Variable temperature dc susceptibility data of polycrystalline <b>4</b> collected under 0.05 kOe, 0.1 kOe, 0.5 kOe and 1kOe applied dc field.                                                                        | S12 |
| <b>Figure S9.</b> In-phase ( $\chi_M'$ ) components of the ac magnetic susceptibility for <b>2</b> under zero applied dc.                                                                                                              | S13 |
| <b>Figure S10.</b> Cole-Cole plots for ac susceptibility collected under zero applied dc field for <b>2</b> .                                                                                                                          | S14 |
| <b>Figure S11.</b> Cole-Cole plots for ac susceptibility collected under zero applied dc field for <b>3</b> .                                                                                                                          | S15 |
| <b>Figure S12.</b> Variable field magnetization ( $M$ ) data for <b>2</b> .                                                                                                                                                            | S16 |

**Table S1.** Redox potentials<sup>a</sup> observed in THF (0.1 M NBu<sub>4</sub>PF<sub>6</sub>) for complexes **1-3**.

| complex  | E <sup>1/2</sup> (red1) | E <sup>1/2</sup> (red2) | E <sup>1/2</sup> (red3) | E <sup>1/2</sup> (red4) |
|----------|-------------------------|-------------------------|-------------------------|-------------------------|
| <b>1</b> | -0.64                   | -1.37                   | -2.21                   | -2.88                   |
| <b>2</b> | -0.68                   | -1.40                   | -2.26                   | -2.94                   |
| <b>3</b> | -0.64                   | -1.36                   | -2.22                   | -2.90                   |

<sup>a</sup> Potentials in V; referenced to internal ferrocene (Fc);  $\nu = 50$  mV/s.

**Table S2.** Crystallographic Data.

| Compound                                                                 | 1·4THF                | 2·3THF                | 3·3THF                | 6·7THF                 |
|--------------------------------------------------------------------------|-----------------------|-----------------------|-----------------------|------------------------|
| Formula                                                                  | C104 H128 B Gd2 N6 O4 | C100 H120 B N6 O3 Tb2 | C100 H120 B Dy2 N6 O3 | C110 H160 Dy2 K N8 O13 |
| Crystal system                                                           | Triclinic             | Triclinic             | Triclinic             | Monoclinic             |
| Space group                                                              | <i>P-1</i>            | <i>P-1</i>            | <i>P-1</i>            | <i>Cc</i>              |
| <i>a</i> , Å                                                             | 16.4717(6)            | 16.0950(7)            | 16.083(5)             | 22.168(3)              |
| <i>b</i> , Å                                                             | 17.8945(7)            | 17.7564(9)            | 17.739(5)             | 25.230(3)              |
| <i>c</i> , Å                                                             | 18.2112(7)            | 18.5863(9)            | 18.562(5)             | 20.706(2)              |
| $\alpha$ , °                                                             | 115.277(2)            | 115.256(2)            | 115.198(5)            | 90                     |
| $\beta$ , °                                                              | 98.616(2)             | 105.236(2)            | 105.294(5)            | 111.311(2)             |
| $\gamma$ , °                                                             | 102.884(2)            | 103.493(2)            | 103.514(5)            | 90                     |
| <i>V</i> , Å <sup>3</sup>                                                | 4545.2(3)             | 4256.5(4)             | 4243(2)               | 10789(2)               |
| <i>Z</i>                                                                 | 2                     | 2                     | 2                     | 4                      |
| $\rho$ , Mg m <sup>-3</sup>                                              | 1.353                 | 1.391                 | 1.401                 | 1.334                  |
| R1 <sup>a</sup> , wR2 <sup>b</sup> ( <i>I</i> > 2 $\sigma$ ( <i>I</i> )) | 0.0423, 0.0745        | 0.0327, 0.0727        | 0.0303, 0.0688        | 0.0511, 0.1190         |
| R1 <sup>a</sup> , wR2 <sup>b</sup> (all data)                            | 0.0757, 0.0850        | 0.0361, 0.0738        | 0.0389, 0.0726        | 0.0753, 0.1351         |

<sup>a</sup>R1 =  $3\||F_o| - |F_c|/3|F_o|$ . <sup>b</sup>wR2 =  $[3[w(F_o^2 - F_c^2)^2]/3[w(F_o^2)^2]]^{1/2}$ ,  $w = 1/\sigma^2(F_o^2) + (aP)^2 + bP$ , where  $P = [\max(0 \text{ or } F_o^2) + 2(F_c^2)]/3$ .

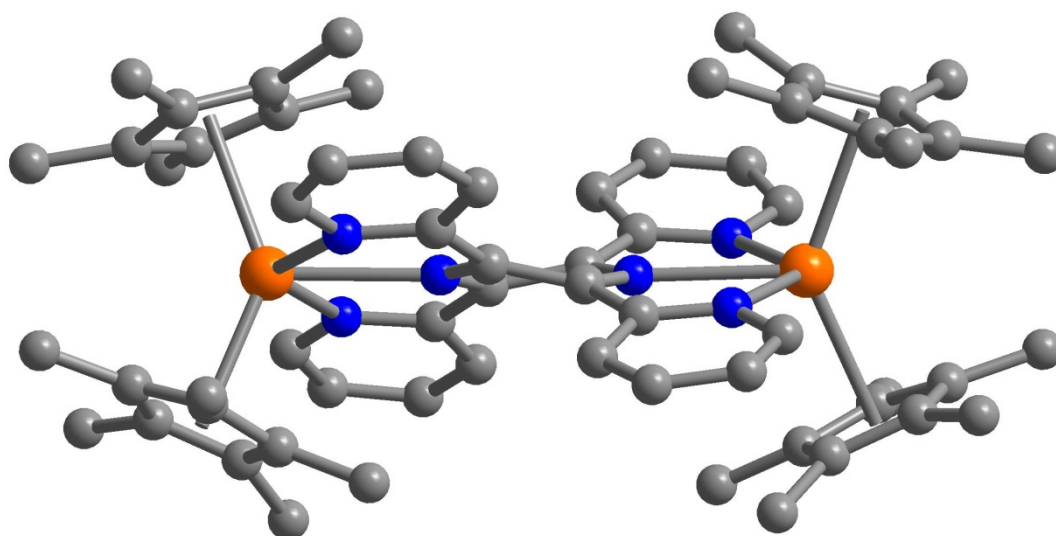

**Figure S1.** Structure of the  $\text{tppz}^{\cdot-}$  radical-bridged cation in complex **1**. Orange, blue and gray spheres represent Gd, N and C atoms, respectively; H atoms have been omitted for clarity.

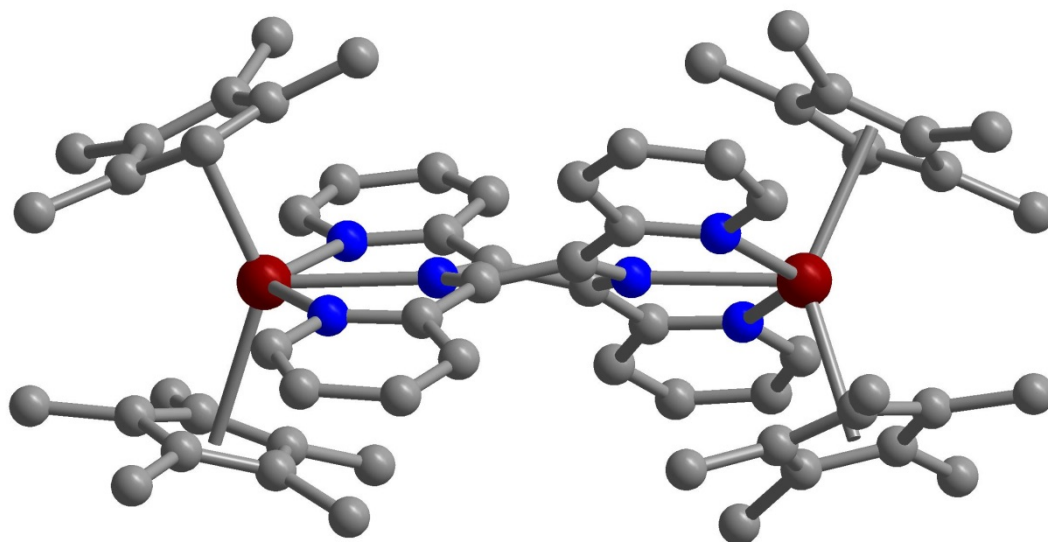

**Figure S2.** Structure of the  $\text{tppz}^{\cdot-}$  radical-bridged cation in complex **2**. Red, blue and gray spheres represent Tb, N and C atoms, respectively; Hydrogen atoms have been omitted for clarity.

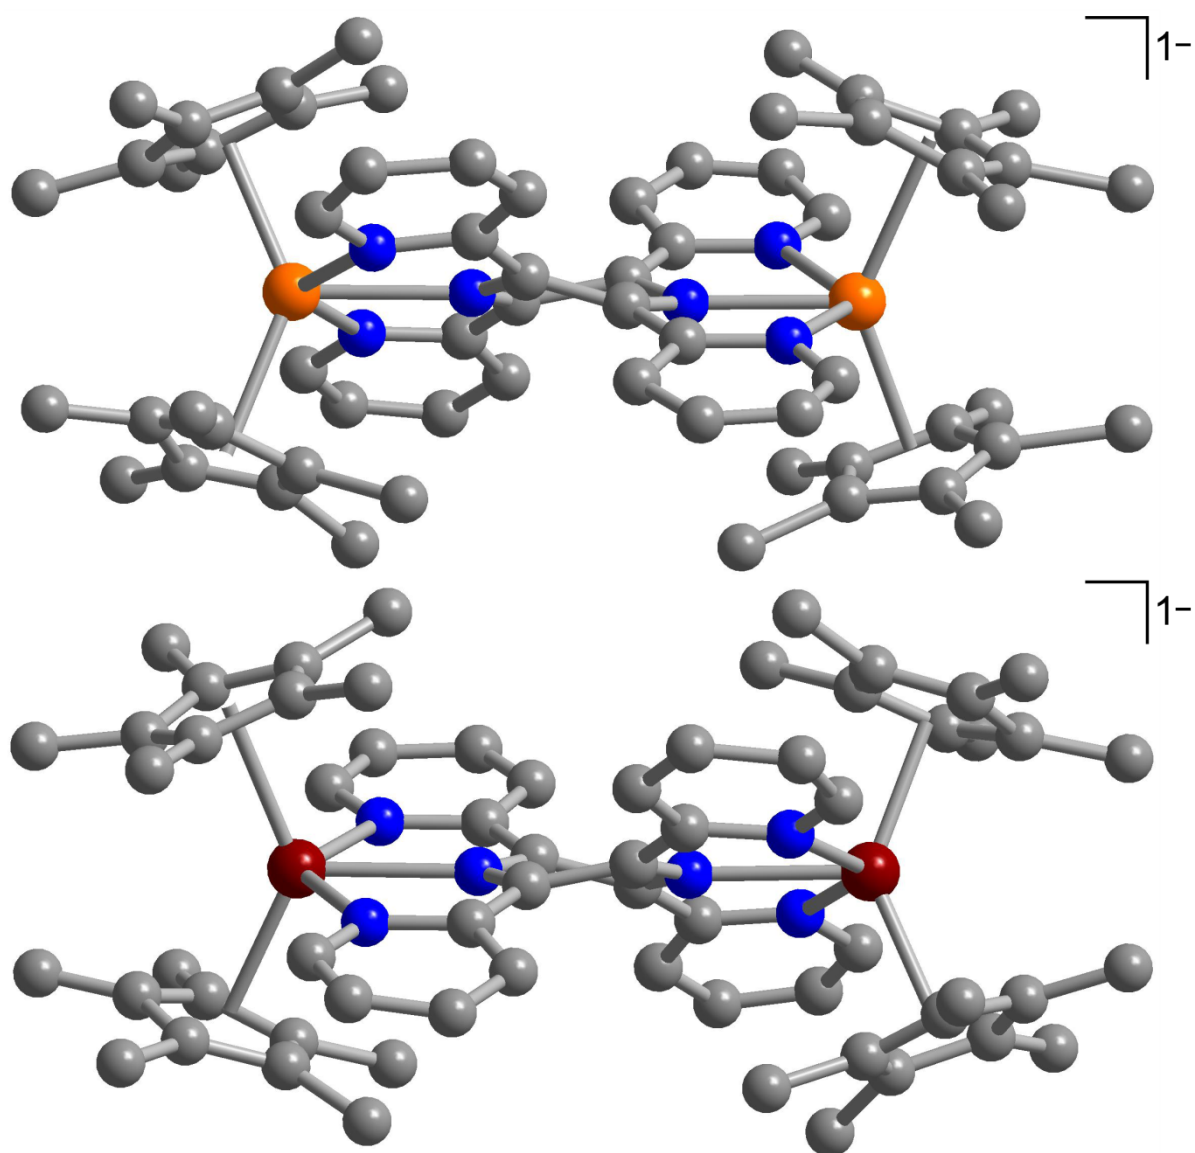

**Figure S3.** Top: Structure of the dinuclear monoanionic fragment in the crystal structure of **4**, showing unaltered intramolecular connectivity upon two  $e^-$  reduction of the monocation in **1**. Orange, blue and gray spheres represent Gd, N and C atoms, respectively; H atoms have been omitted for clarity. Bottom: Structure of the dinuclear monoanionic fragment in the crystal structure of **5**. Red, blue and gray spheres represent Tb, N and C atoms, respectively; H atoms have been omitted for clarity.

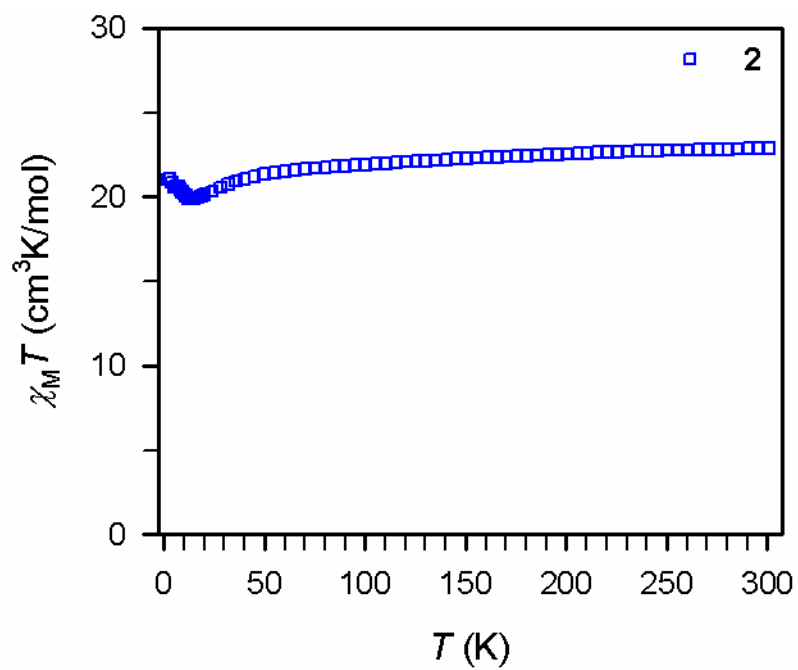

**Figure S4.** Variable-temperature dc magnetic susceptibility data for restrained polycrystalline samples of **2** collected under a 1 kOe applied dc field.



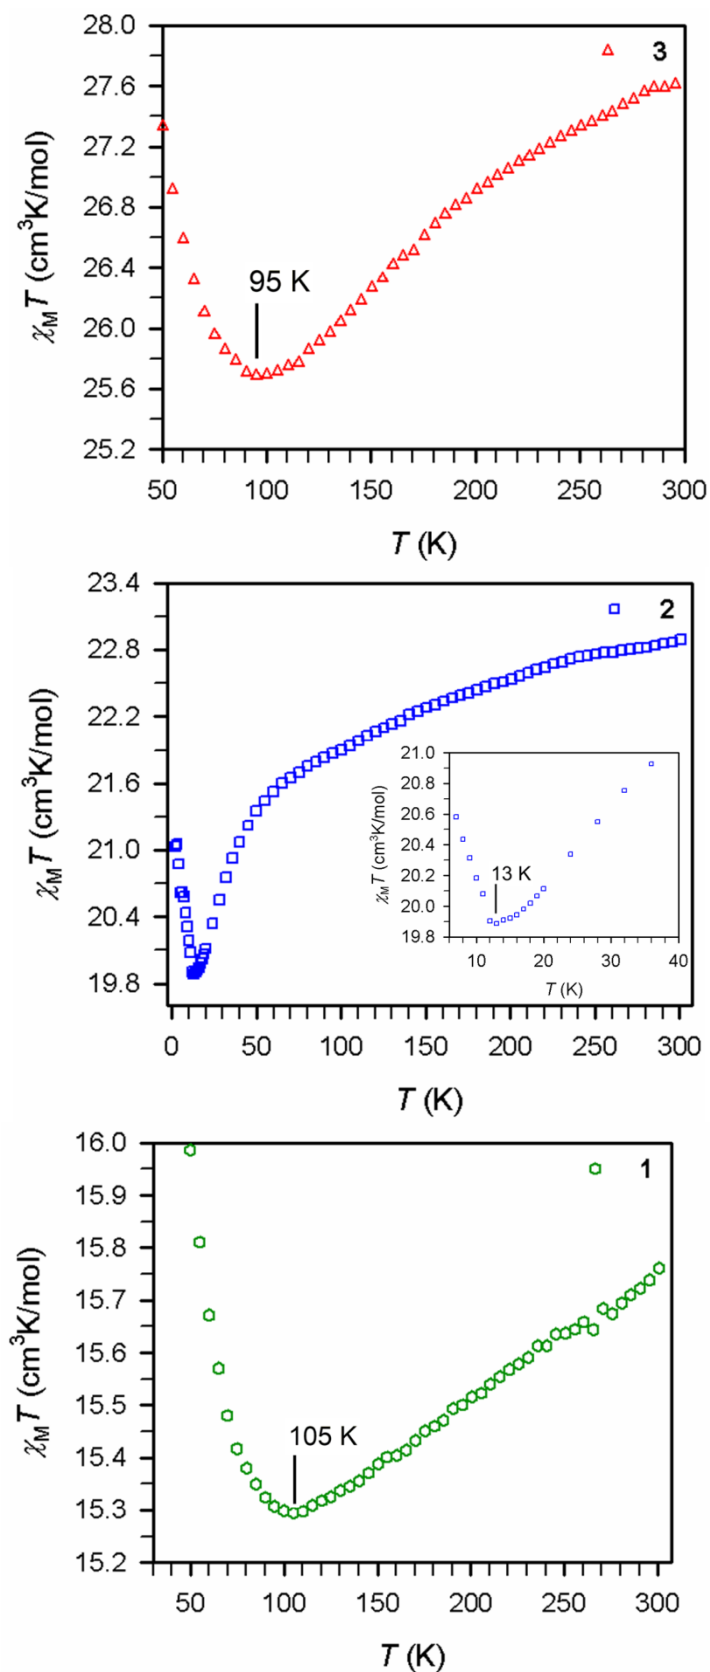

**Figure S5.** Variable temperature dc susceptibility data for **1** (bottom), **2** (middle), and **3** (top), zoomed in to emphasize the minima in  $\chi_M T$  at high- $T$  for each complex. Y-axis values were arbitrarily chosen for each complex in order to provide the best view of the minima for each data set.

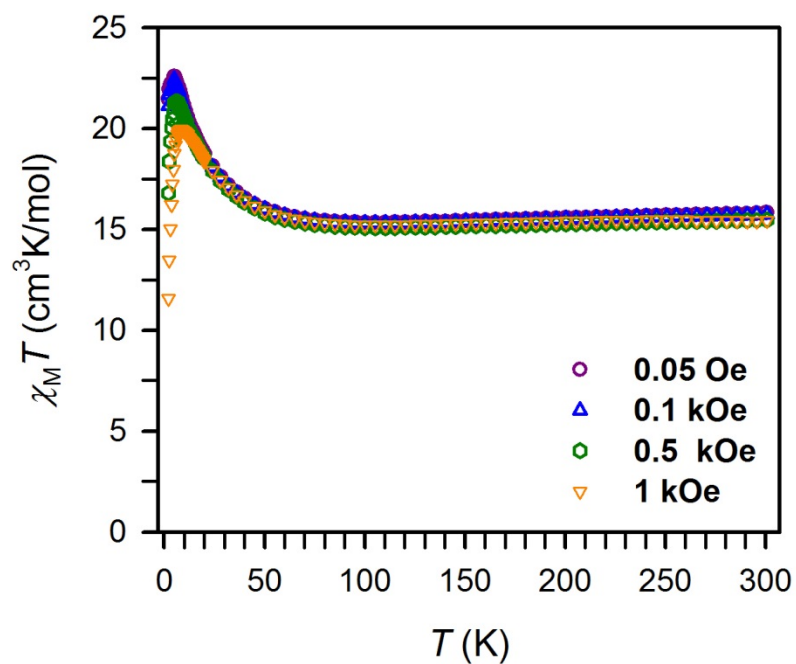

**Figure S6.** Variable temperature dc susceptibility data of polycrystalline **1** collected under 0.05 kOe (purple circles), 0.1 kOe (blue triangles), 0.5 kOe (green hexagons), 1 kOe (orange triangles) applied dc field.

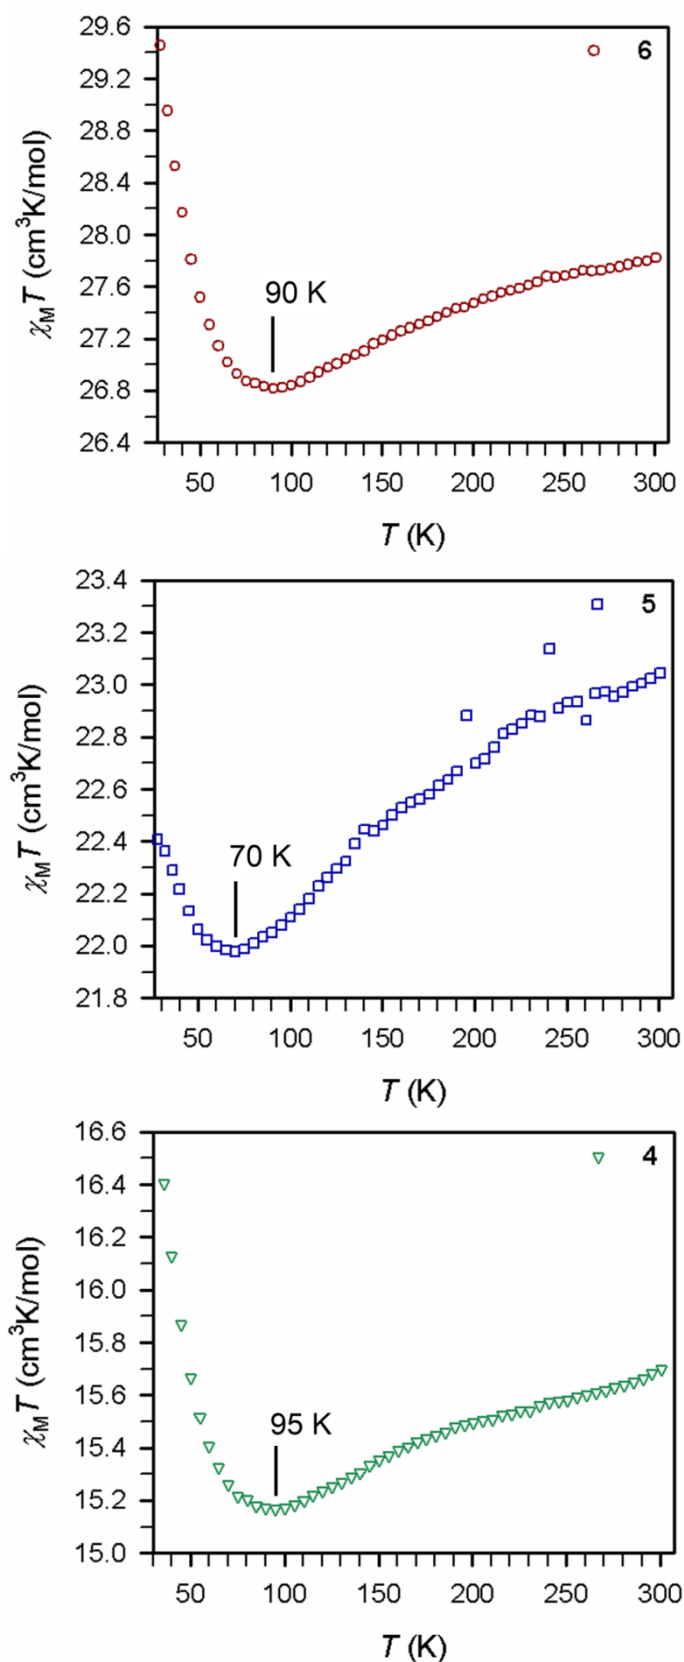

**Figure S7.** Variable temperature dc susceptibility data for **4** (bottom), **5** (middle), and **6** (top), zoomed in to emphasize the minima in  $\chi_M T$  at high- $T$  for each complex. Y-axis values were arbitrarily chosen for each complex in order to provide the best view of the minima for each data set.

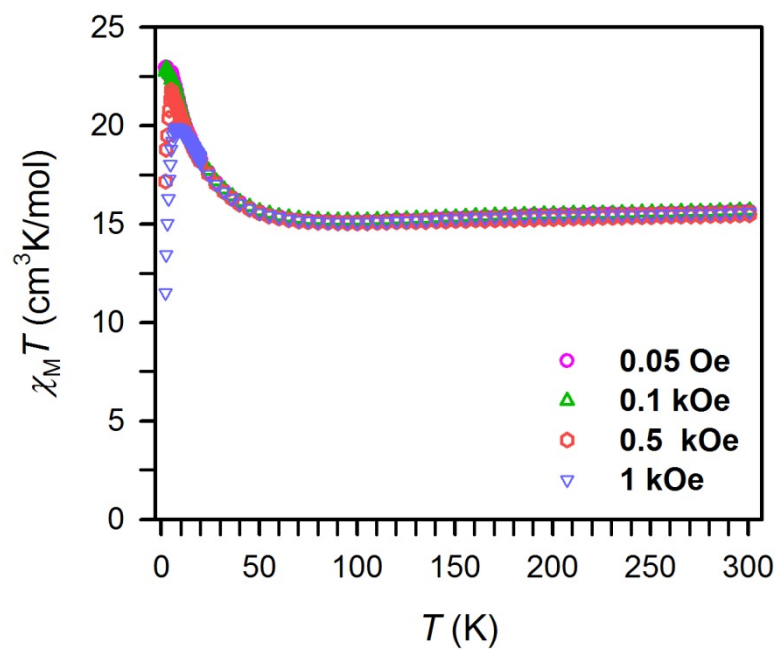

**Figure S8.** Variable temperature dc susceptibility data of polycrystalline **4** collected under 0.05 kOe (pink circles), 0.1 kOe (green triangles), 0.5 kOe (red hexagons), 1 kOe (blue triangles) applied dc field.

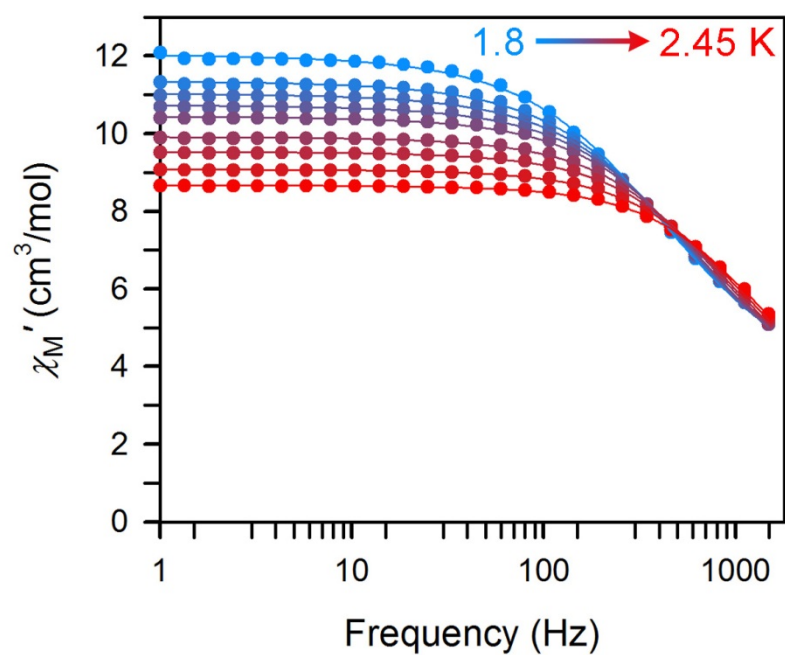

**Figure S9.** In-phase ( $\chi_M'$ , top) components of the ac magnetic susceptibility for **2** under zero applied dc field from 1.8 K (blue circles) to 2.45 K (red circles). Solid lines represent a fit to the data.

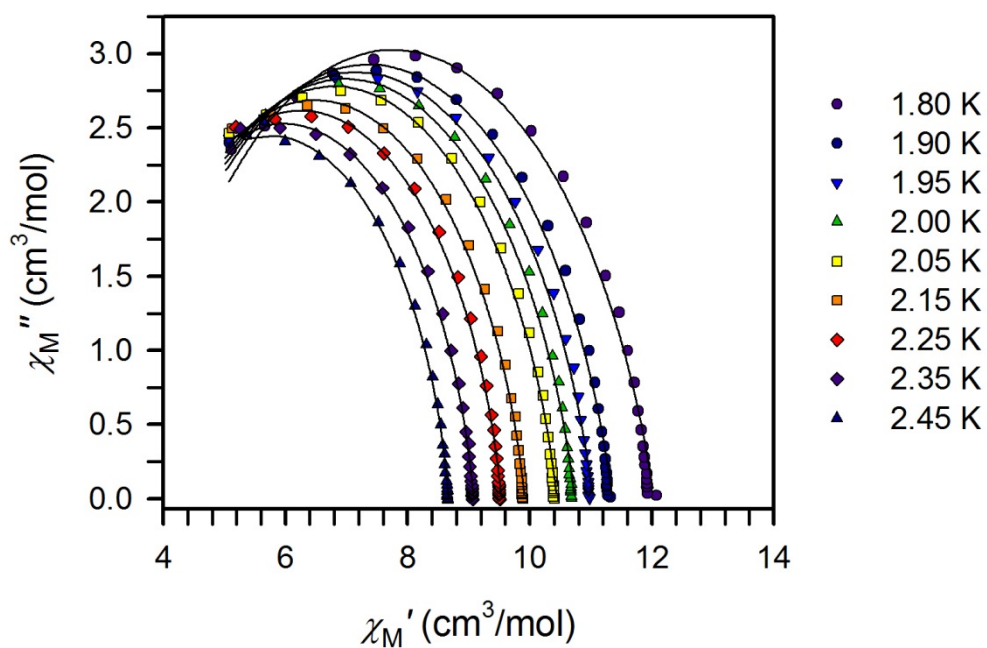

**Figure S10.** Cole-Cole (Argand) plots for ac susceptibility collected under zero applied dc field for **2**. Symbols represent the experimental data points and the points representing the fits are connected by solid black lines.

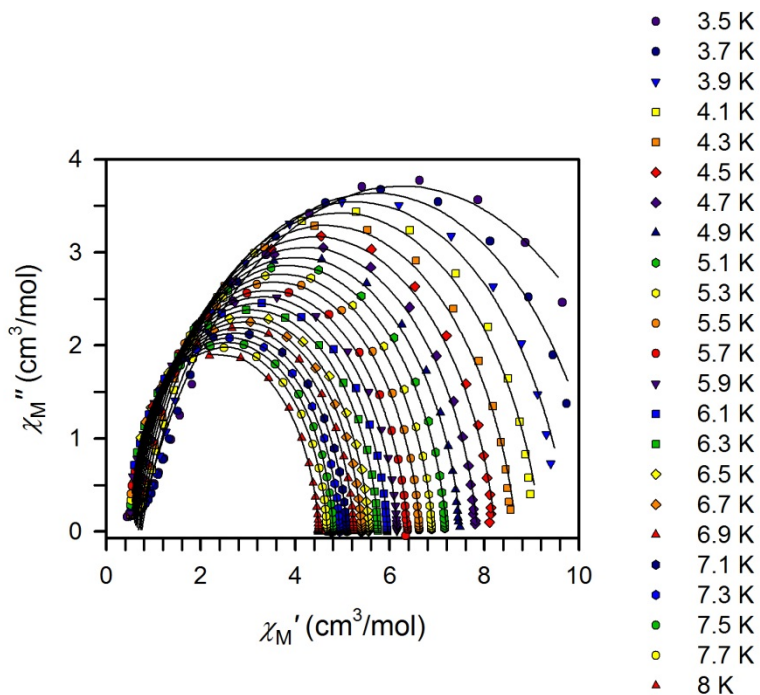

**Figure S11.** Cole-Cole (Argand) plots for ac susceptibility collected under zero applied dc field for **3**. Symbols represent the experimental data points and the points representing the fits are connected by black solid lines.

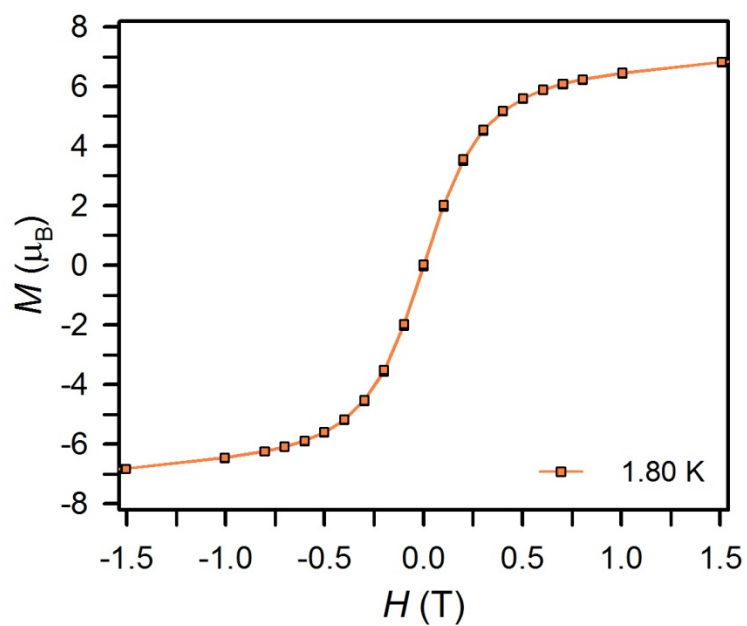

**Figure S12.** Variable field magnetization ( $M$ ) data for **2** collected at 1.8 K at an average sweep rate of  $0.004 \text{ Ts}^{-1}$ .
